# Supplementary material for: Simultaneous determination of lead and copper in Polygonatum kingianum by ICP OES combined with natural deep eutectic solvent-based magnetic dispersive micro solid phase extraction
Source: Royal Society of Chemistry journal article supplement (doi:10.1039/d2ja00130f), 2022-01-01
Supplement: d2ja00130f1.pdf [file d2ja00130f1.pdf]

**Simultaneous determination of lead and copper in  
*Polygonatum kingianum* by ICP OES combined with natural  
deep eutectic solvent-based magnetic dispersive micro solid  
phase extraction**

Rui Zhang<sup>a</sup>, Xiaofang Yang<sup>a</sup>, Daichun He<sup>a</sup>, Ya Liu<sup>a</sup>, Yunlong Zhu<sup>a</sup>, Zhengui Li<sup>b</sup>, Yong  
Liu<sup>a</sup>, Qingwen Deng<sup>a</sup>, Shengchun Yang<sup>a\*</sup>, XiaodongWen<sup>a\*</sup>

a College of Pharmacy, Dali University, Dali, Yunnan 671000, China

b Analytical & Testing Center, Dali University, Dali, Yunnan 671000, China

---

\*Corresponding authors. Tel: 86-872-2218 886; E-mail: [wenxiaodong@dali.edu.cn](mailto:wenxiaodong@dali.edu.cn)  
(X.D. Wen), [yangshengchun@dali.edu.cn](mailto:yangshengchun@dali.edu.cn) (S.C. Yang).

**Table S1 Optimal instrumental parameters for ICP OES**

---

| Parameter                                           | Optimal condition |
|-----------------------------------------------------|-------------------|
| ICP RF power (W)                                    | 1300              |
| Plasma gas flow rate (Ar) (L min <sup>-1</sup> )    | 15                |
| Auxiliary gas flow rate (Ar) (L min <sup>-1</sup> ) | 0.2               |
| Atomizer gas flow rate (Ar) (L min <sup>-1</sup> )  | 0.55              |
| Pump injection volume (mL min <sup>-1</sup> )       | 1.5               |
| Reading delay time (s)                              | 40                |
| Replicate                                           | 3                 |
| Pb analysis line (nm)                               | 220.35            |
| Cu analysis line (nm)                               | 327.39            |

---

**Table S2 Microwave digestion program**

---

| Step | Temperature (°C) | Rising temperature time (min) | Retention time (min) | Power (W) |
|------|------------------|-------------------------------|----------------------|-----------|
| 1    | 120              | 12                            | 22                   | 1500      |
| 2    | 180              | 6                             | 45                   | 1500      |

---
